# Supplementary material for: Uncorrelated Inequalities: A Multiproxy Measure Suggests Reduced Household Disparity
Source: Research Square preprint supplement (doi:10.21203/rs.3.rs-7983970/v1), 2025-11-14
Supplement: Supplementary file 1 [file e166cbdca35f1e13cd9b360d.docx]

**Supplementary materials:** Rationale for variable selection and presentation of household data

Title: Uncorrelated Inequalities: A Multiproxy Measure Suggests Reduced Household Disparity

Author: Scott R. Hutson

Journal: *Journal of Archaeological Method and Theory*

As discussed in the main body of the paper, the variables used in this study should be proxies for some form of inequality. In other words, the variables should represent resources that are desirable yet limited. For each site, I provide the rationale for why the variables are desirable yet limited as well as tables containing the original data.

# Uxul

**Residential surface area**: Archaeologists in Mesoamerica often observe a correlation between house size and wealth (Folan et al. 2009; Haviland and Moholy-Nagy 1992; Carmean et al. 2011; Tourtellot et al. 1992). Houses with larger surface area require more material, time, and labor to construct, and therefore make use of limited resources (Smith et al. 2014:312). While people may also build larger houses because they need more space for people or storage, these concerns also involve inequality since an increase in residents means greater access to labor and more storage means possession of more resources (Kohler et al. 2025). Data come from Barnard 2021 table 4.1.

**Architectural volume**: Volume of construction indexes of wealth, since it captures the costs of material and labor more accurately than surface area (Smith et al. 2014:312). Two houses with the same surface area may represent very different expenditures if one is built on a voluminous platform and the other is not. Nevertheless, volume may depend on occupational length (see Hutson 2016:151–152, 2020a:411–412). Data come from Barnard 2021 table 4.1.

**Amount of obsidian**: the jury is still out regarding whether or no obsidian in the Central Maya Lowlands during the Late Classic should be considered a wealth good (Rice 1987). Some sites have a lot (Tikal; Moholy-Hagy 1989) while other sites, such as nearby Calakmul (Braswell 2013) have very little. Uxul has more than Calakmul (Barnard 2021a:231) but is not located near obsidian sources. Thus, obsidian is limited and requires resources to procure, while it is desirable for many tasks because it is sharper than cutting tools made from locally available flint. Data come from Barnard 2021 table 6.36.

**Amount of jadeite**: The high symbolic value and desirability of jadeite, which is geologically rare, are not debated among Mayanists (Freidel et al. 2002; Taube 1998) though nuanced discussions can be made as to the means by which it was distributed and attempts to control its circulation (McAnany 1993; Kovacevich 2017). Data come from Barnard 2021 table 6.42.

**Amount of polychrome pottery**: Finely made pottery is often correlated with wealth (Drennan et al. 2010). Polychrome pottery, which Barnard (2021:199) regards as an expensive resource, comprised a small portion of the pottery at Uxul and workshops for its production are often restricted to elite contexts (Reents-Budet et al. 2000), though not always (Becker 2003). Data come from Barnard 2021. table 6.23.

**Amount of shell artifacts**: Marine shell is a limited resource since it is not locally available. Barnard (2021:253) refers to it as a precious material used to make ornaments. Beyond ornaments, Hohmann and coauthors (2018:117) note that shell’s “predominance in Maya ritual offerings indicates that some were highly valued and imbued with ritual significance.” Data come from Barnard 2021 table 6.44.

**Amount of incense burners**: Incense burners are closely linked to ritual practices such as ancestor veneration, cleansing, initiation and termination rituals, and more (Barnard 2021a:279). Their use in proper ceremonial context implies a degree of sacred knowledge on behalf of the user/owner. Incense burners are thus an embodied resource but may also be a wealth resource given their limited distribution in the archaeological record. Data come from Barnard 2021 table 6.49.

**Amount of figurines**: Figurines in Mesoamerica were used in various contexts, including fertility rituals, ancestor veneration, child’s play, burial offerings, cache deposits, and more. Given the nature of the figurines found at Uxul, Barnard (2021a:274) considers most of them to have had ceremonial uses. As such, figurines in household contexts reflect investment in small-scale ritual practice. They are somewhat rare, with 0.5 figurines or fragments per 1000 ceramic sherds, and found in greater abundance within larger houses. Data come from Barnard 2021 table 6.47.

**Amount of musical instruments**: Whistles, ocarinas, drums, and trumpets are special purpose artifacts that are rare and difficult to manufacture. They are therefore a wealth resource but also suggest embodied resources since their possession entails the skill and training required for musical performances; Barnard (2021a:277) considers them to be ceremonial practice. Data come from Barnard 2021 table 6.48.

Supplementary table 1: Residential group data for Uxul


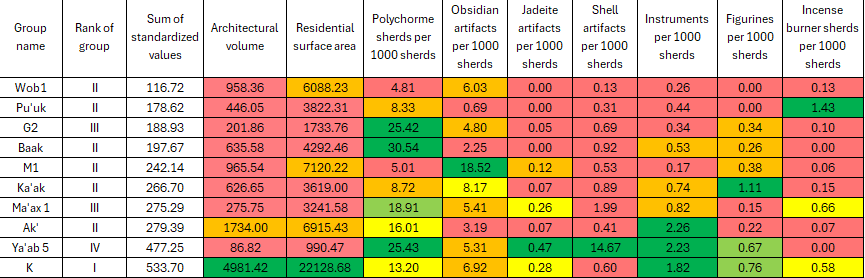


# Mayapan

**Residential surface area**: Archaeologists in Mesoamerica often observe a correlation between house size and wealth (Folan et al. 2009; Haviland and Moholy-Nagy 1992; Carmean et al. 2011; Tourtellot et al. 1992). Houses with larger surface area require more material, time, and labor to construct, and therefore make use of limited resources (Smith et al. 2014:312). While people may also build larger houses because they need more space for people or storage, these concerns also involve inequality since an increase in residents means greater access to labor and more storage means possession of more resources (Kohler et al. 2025).

**Amount of obsidian**: While over 6,000 artifacts have been recovered by recent projects at Mayapan (Escamilla et al. 2021), Mayapan is located a very long distance (over 600 km as the crow flies) from obsidian sources. Acquisition of obsidian therefore required resources and it is desirable for many tasks because it is sharper than cutting tools made from locally available flint. At several sites located much closer than Mayapan to obsidian sources, obsidian is associated with wealth and inequality (Meierhoff et al. 2012; Bijac Phase Copan, Aoyama 2001).

**Amount of chert**: Good quality chert is not a locally available resource at Mayapan and had to be imported from the Puuc hills to the south or further afield such as Northern Belize.

**Amount of chert points**: few artisans possessed the knowledge required to produce points, and the raw material itself needed to be imported from distances that required several days of walking.

**Amount of fancy pottery**: Fancy pottery is often correlated with wealth (Drennan et al. 2010). Fancy pottery, as reported by Peraza Lope and coauthors (2021:243) comprises less than 2% of the full amount of sherds reported for the eight households used in this study. This is therefore a limited good and some types, such as Pele polychrome, were highly valuable and likely not available at the marketplace (Peraza Lope et al. 2021:247), suggesting the need for not both material and social resources.

**Amount of imported pottery**: Imported pottery, as reported by Peraza Lope and coauthors (2021:243) comprises approximately 0.6% of the full amount of sherds reported for the eight households used in this study. Although imported pottery is the most rare category of pottery found at Mayapan, sherds from the only definitively imported type, Matillas Fine Orange were found in most household contexts, suggesting their availability at a marketplace (Peraza Lope et al. 2021:249). Yet amounts of this rare and presumably costly type varied significantly across households, suggesting differences in how households invested their resources.

**Amount of ritual pottery**: Ritual pottery, as reported by Peraza Lope and coauthors (2021:243) comprises less than 3% of the full amount of sherds reported for the eight households used in this study. This is therefore a limited good and also presumes a degree of embodied wealth in terms of the training and knowledge for proper ceremonial performance.

**Amount of shell artifacts**: Mayapan relied completely on trade networks with coastal sites to procure shell for ornaments, indicating that shell was a limited material (Masson and Peraza Lope 2014:314). Furthermore, shell beads were described as wealth in the form of currency during the Contact period (Tozzer 1941:95-96) and it is likely that shell beads served the same function two centuries earlier when Mayapan was thriving (Freidel et al. 2002).

**Amount of metal artifacts**: Research on metal artifacts at Mayapan (Paris 2008) strongly suggests that they are a luxury good and therefore a useful variable for studying different forms of inequality.

Supplementary table 2: Residential group data for Mayapan


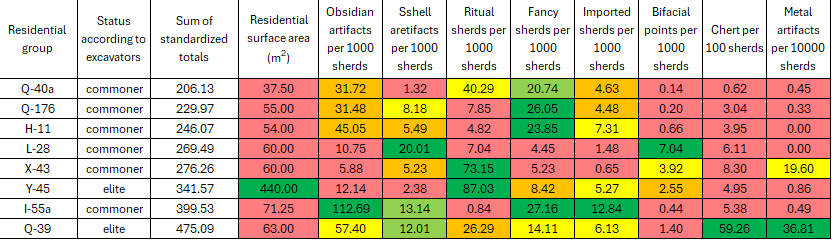


# Ҫatalhöyük

Each of the variables for inequality at Catalhoyuk were taken from the study by Twiss and co-authors (2024). I have not imported all of the variables presented by Twiss because for some of them (such as building surface area and presence of side room) data are not available. Table 3 of their study presents citations for the relation that each of their variables has with inequality. While I encourage readers to consult table 3 and the citations therein for comprehensive rationales, I present selected citations below:

**Grinding tools**: Berrey and coauthors (2021), Wright (2014).

**Wall paintings**: Hodder (2014), Rosenberg and Rocek (2019).

**Faunal installations**: Hodder and Pels (2010), Mellaart (1967)

**Human burial MNI**: Hodder and Pels (2010), Kuijt (2018), Shenk et al. (2010).

**Quantity of grave goods**: Kuijt and coathors (2011), Mellaart (1967), Peterson and Drennan (2018).

**Quantity of exotic shells** and **Exotic shell sources**: Feinman and co-authors (2018), Trubitt 2003).

**Quantity of exotic stone beads**: Prentiss and coauthors (2018), Tsoraki (2021).

Supplementary table 3: Residential group data for Ҫatalhöyük


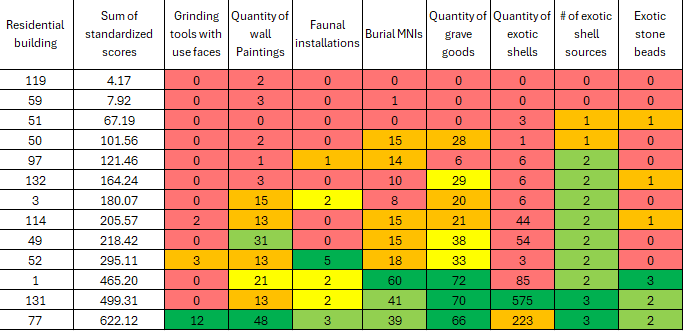


# Tikal

**Residential surface area**: Archaeologists in Mesoamerica often observe a correlation between house size and wealth (Folan et al. 2009; Haviland and Moholy-Nagy 1992; Carmean et al. 2011; Tourtellot et al. 1992). Houses with larger surface area require more material, time, and labor to construct, and therefore make use of limited resources (Smith et al. 2014:312). While people may also build larger houses because they need more space for people or storage, these concerns also involve inequality since an increase in residents means greater access to labor and more storage means possession of more resources (Kohler et al. 2025).

**Assemblage Diversity**. Canonical texts in the archaeology and anthropology of inequality emphasize that wealthier households “possess a greater variety or diversity of material goods” (Smith 1987:319; see also Lewis 1973:269). While marketplace exchange should neutralize this effect, increasing “the homogeneity of artifact assemblages between households of all ranks” (Barnard 2021b:152), Haviland (2014) has noted the correlation between assemblage diversity and wealth for Tikal and his observations have been replicated (see Hutson 2020b). In the table below, assemblage diversity is quantified as non-ceramic artifacts per square meter of excavation.

**Marine Shell**: Several authors have argued that marine shell was a status good with profound political, social and economic value in Maya societies ranging from the Preclassic to the Postclassic (Freidel et al. 2002; Hohmann et al, 2018:118; Isaza Aizpurúa and McAnany 1999). Shell artifacts most often take the form of personal adornments but their predominance in ritual offerings “indicates that some were highly valued and imbued with ritual significance” (Hohmann et al. 2018:117). While ethnohistoric accounts name shell beads as a form of currency during the contact period (Tozzer 1941:95-96), their common representation as tribute supports their status as a wealth good in the Classic period (Houston 2000:173).Moholy-Nagy (1995) divides shell at Tikal into a higher ranking assemblage of fine examples, emphasizing red Spondylus and confined to elite contexts, and a lower ranking assemblage consisting largely of less elaborate items made of more common conch and freshwater mollusks. She argues that production of this second assemblage often took place in lower status households (Moholy-Nagy 1985).

**Obsidian**: Though Tikal is not near any obsidian sources, it was not a limited good at the site. In fact, obsidian appears to be more common in lower status residences than in large range structures (Moholy-Nagy 1989; see also Masson and Freidel 2012). Nevertheless, closer scrutiny of the distribution of obsidian within lower status residences at Tikal shows that it is positive correlated with other variables for wealth (Hutson 2020b).

Supplementary table 4: Residential group data for Tikal

| Residential group | Sum of standardized values | Assemblage diversity | Obsidian artifacts per m2 of excavation | Shell per m2 of excavation | Residential surface area |
| --- | --- | --- | --- | --- | --- |
| 6c5 | 0.2 | 0.000 | 0.00 | 0.00 | 2.0 |
| str 6f-62 | 3.1 | 0.000 | 0.00 | 0.00 | 30.0 |
| str 6c-60 | 8.1 | 0.000 | 0.01 | 0.00 | 71.6 |
| 5b2 | 10.6 | 0.000 | 0.05 | 0.00 | 80.0 |
| 3d3 | 11.8 | 0.000 | 0.00 | 0.00 | 113.0 |
| 5c3 | 12.6 | 0.000 | 0.05 | 0.00 | 100.0 |
| 7f2 | 18.6 | 0.000 | 0.06 | 0.00 | 152.0 |
| 2b1 | 24.3 | 0.000 | 0.04 | 0.00 | 218.0 |
| 6b3 | 28.4 | 0.000 | 0.25 | 0.00 | 166.0 |
| 5f2 | 33.3 | 0.006 | 0.20 | 0.02 | 173.7 |
| str 2g-61 | 36.6 | 0.016 | 0.18 | 0.03 | 135.5 |
| 4e2 | 37.6 | 0.022 | 0.04 | 0.00 | 230.0 |
| 2f1 | 38.4 | 0.009 | 0.02 | 0.00 | 308.0 |
| 2g2 | 39.8 | 0.045 | 0.08 | 0.00 | 125.0 |
| 7c1 | 42.7 | 0.037 | 0.31 | 0.02 | 56.8 |
| 3f3 | 42.8 | 0.033 | 0.03 | 0.00 | 231.5 |
| 3f2 | 43.0 | 0.044 | 0.13 | 0.01 | 114.8 |
| 3d9 | 48.1 | 0.037 | 0.31 | 0.06 | 40.0 |
| 3f1 | 52.4 | 0.045 | 0.39 | 0.00 | 108.5 |
| 4e1 | 58.4 | 0.021 | 0.06 | 0.00 | 430.0 |
| 2g1 | 66.9 | 0.035 | 0.39 | 0.03 | 239.5 |
| 4f3 | 71.1 | 0.060 | 0.66 | 0.02 | 65.5 |
| 7g1 | 75.0 | 0.071 | 0.29 | 0.07 | 110.0 |
| 7c2 | 94.8 | 0.083 | 0.58 | 0.00 | 246.8 |
| 3g1 | 114.7 | 0.083 | 0.29 | 0.04 | 485.0 |
| 4f1 | 115.9 | 0.026 | 0.98 | 0.06 | 454.0 |
| 6c2 | 148.7 | 0.167 | 0.25 | 0.08 | 338.0 |
| str 7c-62 | 150.6 | 0.171 | 0.63 | 0.17 | 7.5 |
| 5d1 | 168.0 | 0.042 | 0.77 | 0.06 | 960.0 |
| 4f2 | 170.1 | 0.043 | 2.25 | 0.10 | 275.0 |
| 5f1 | 198.5 | 0.117 | 0.52 | 0.52 | 145.0 |
| 6e1 | 231.6 | 0.193 | 1.15 | 0.35 | 117.0 |
| 6c1 | 232.9 | 0.114 | 1.43 | 0.42 | 276.0 |
| str 5c-56 | 235.9 | 0.186 | 1.16 | 0.43 | 51.0 |

# Copan

**Residential surface area**: Archaeologists in Mesoamerica often observe a correlation between house size and wealth (Folan et al. 2009; Haviland and Moholy-Nagy 1992; Carmean et al. 2011; Tourtellot et al. 1992). Houses with larger surface area require more material, time, and labor to construct, and therefore make use of limited resources (Smith et al. 2014:312). While people may also build larger houses because they need more space for people or storage, these concerns also involve inequality since an increase in residents means greater access to labor and more storage means possession of more resources (Kohler et al. 2025). The data on residential surface area come from chapter four of Hendon 1987.

**Architectural labor investment**: For this variable the most accurate measure at Copan would be person-days of construction labor, as calculated quite precisely by Elliott Abrams (1994). However, Abrams did not calculate labor for two of the nine groups in my sample, and in six of the remaining seven groups, labor calculations are available for only some of the buildings in those groups. Therefore, I produced labor investment scores based on information reported in Hendon (1987: chapter 4)) about building size, style of wall construction and roof type. These scores closely approximate the labor investment calculations made by Abrams, though with one important discrepancy: patio 9N-8a, the largest and most elaborate patio in Sepulturas. Abrams’ person-day calculation for patio 9N-8a was nearly three times larger than the next highest patio group, but in the scores I generated based on wall type, roof type, and size, 9N-8a’s score was not even twice as large as the next highest scoring group. To fix this discrepancy, I increased 9n-8’s score so that it would be nearly three times the score of the next highest scoring group. With this adjustment, the correlation coefficient between the Abrams’ person-day calculations and the scoring system I devised is high (r = 0.951, p < 0.001). This close similarity to Abrams’ calculations indicates that the scoring system is valid and can be applied to the buildings in my sample that Abrams did not tabulate.

**Extent of sculpture**: architectural sculpture, which in the case of structure 9N-82c, in patio 9N-8a, includes inscribed writing that names a titled lord, is a clear marker of social status but required relational, embodied, and physical resources to materialize. The data for this variable are reported by Hendon (1987:431, 1991:905) in terms of the number of buildings per group with sculpture.

**Imported fancy pottery.** Fancy pottery is often correlated with wealth (Drennan et al. 2010). Imported fancy pottery makes up about 6% of the pottery of the Coner phase residential groups in this sample. While fancy pottery does not necessarily require extra labor to produce, the skill set for producing it was more limited and the fact that it was an import further limited its availability. In the table below, imported fancy pottery was reported as a percentage of total fancy pottery (Hendon 1991:908).

**Quantity of portable ornaments**: Ornaments as reported in Hendon (1987) consist of a variety of materials, predominantly jades, slate batons, “stone ornaments”, ceramic jewelry, and marine shell jewelry. Each of these ornaments were of limited circulation either due to the exotic nature of the raw material or the artisanry required to craft them. The data on portable ornaments come from chapter four of Hendon 1987.

**Figurines**: Figurines in Mesoamerica were used in various contexts, including fertility rituals, ancestor veneration, child’s play, burial offerings, cache deposits, and more. I have included this variable for Copan because 70% of the figurines and whistles were imported (Gerstle 1988:115-117) and because Coner phase inhabitants placed “considerable importance” on the use and possession of figurines (Hendon 1991:909). Insofar as figurines and rituals function as “important components of religious observation” (Hendon 1991:911), they entail ceremonial knowledge, a form of embodied resource. The data come from Gerstle 1988:151.

**Chert and obsidian bifacial points**: Unlike obsidian blades, which were manufactured in many households at Copan, few artisans possessed the knowledge required to produce bifaces. The data come from Gerstle 1988:209.

**Worked bone**: The worked bone artifacts included here consist of ornamental or decorative items such “perforated mandibles and teeth, and bone beads, rings, and tubes (the latter may include musical flutes)” (see Gerstle 1988:213 for the quote and the data).

**Proportion of basalt grinding stones/metates**. Most ground stone tools at Copan were made from widely available rhyolite. Basalt outcrops are infrequent in the Copan Valley (Gerstle 1988:227). Basalt metates have been long been recognized as a desirable but limited resource in the Maya lowlands (Rathje 1972). The data come from Gerstle 1988:227.

Supplementary table 5: Residential group data for Copan.


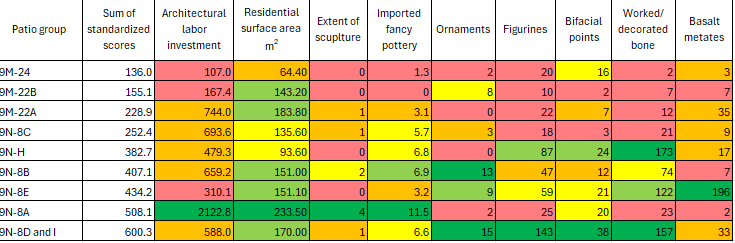


References cited

Abrams, Elliott

1994 *How the Maya Built Their World*. University of Texas Press, Austin.

Aoyama, Kazuo

2001 Classic Maya State, Urbanism, and Exchange: Chipped Stone Evidence from the Copan Valley and its Hinterland. *American Anthropologist* 103:346-360.

Barnard, Els

2021a *Inequality, Wealth, and Market Exchange in the Maya Lowlands: A household-based approach to the economy of Uxul, Campeche, Mexico*. BAR.

Barnard, Els

2021b Wealth Inequality and Market Exchange: A Household-Based Approach to the Economy of Late Classic Uxul, Campeche*.* In *Urban Commerce in Ancient Mesoamerica*, Vol 32, edited by Elizabeth Paris, pp. 143-156. American Anthropological Association, Arlington, VA.

Becker, Marshall

2003 A Classic-Period Barrio Producing Fine Quality Ceramics at Tikal Guatemala. *Ancient Mesoamerica* 14:95-112.

Berrey, C. Adam, Robert D. Drennan, and Christian Peterson

2021 Local economies and household spacing in early chiefdom communities. *PLOS ONE* 16(5):e0252532.

Braswell, Geoffrey E.

2013 Ancient Obsidian Procurement and Production in the Peten Campechano: Uxul and Calakmul During the Early Classic to Terminal Classic Periods. *Indiana* 30:149-171.

Carmean, Kelli, Patricia A. McAnany, and Jeremy A. Sabloff

2011 People Who Lived in Stone Houses: Local Knowledge and Social Difference in the Classic Maya Puuc Region. *Latin American Antiquity* 22:143-158.

Escamilla Ojeda, Bárbara del C. , and Pedro C. Delgado Kú

2021 Obsidian from Two Neighborhoods at Mayapán*.* In *Settlement, Economy, and Society, at Mayapan, Yucatan, Mexico*, edited by Marilyn A. Masson, Timothy S. Hare, Carlos Peraza Lope, and Bradley W. Russell, pp. 337-354. University of Pittsburgh Memoirs in Latin American Archaeology, Vol. 27. Center for Comparative Archaeology, Pittsburgh.

Feinman, Gary M., Linda M Nicholas, and Ronald Falseit

2018 Assessing Wealth Inequality in the Pre- Hispanic Valley of Oaxaca: Comparative Implications*.* In *Ten Thousand Years of Inequality: The Archaeology of Wealth Differences*, edited by Timothy A. Kohler, and Michael E. Smith, pp. 289-317. University of Arizona Press, Tucson.

Folan, William, Armando Anaya Hernandez, Ellen R. Kintz, Laraine A. Fletcher, Raymundo Gonzalez Heredia, Jacinto May Hau, and Nicolas Caamal Canche

2009 Coba, Quintana Roo, Mexico: A Recent Analysis of the Social, Economic and Political Organization of a Major Maya Urban Center. *Ancient Mesoamerica* 20:59-70.

Freidel, David A., Kathryn Reese-Taylor, and David Mora-Marin

2002 The Origins of Maya Civilization: The Old Shell Game, Commodity, Treasure and Kingship*.* In *Ancient Maya Political Economies*, edited by Marilyn A. Masson, and David A. Freidel, pp. 41-86. Altamira, Walnut Creek.

Gerstle, Andrea Irene

1988 Maya-Lenca Ethnic Relations in Late Classic Copan, Honduras, Anthropology, UC Santa Barbara.

Haviland, William A.

2014 *Excavations in Residential areas of Tikal: Non-elite Groups without Shrines: Analysis and Conclusions*. Tikal Report No. 20B. University of Pennsylvania Museum of Archaeology and Anthropology, Philadelphia.

Haviland, William A., and Hattula Moholy-Nagy

1992 Distinguishing the High and Mighty from the Hoi Polloi at Tikal, Guatemala*.* In *Mesoamerican Elites*, edited by Diane Z. Chase, and Arlen F. Chase, pp. 50-60. University of Oklahoma Press, Norman.

Hendon, Julia

1987 The uses of Maya structures: A study of architecture and artifact distribution at Sepulturas, Copan, Honduras. Doctoral Dissertation, Harvard University.

Hendon, Julia A.

1991 Status and Power in Classic Maya Society: An Archaeological Study. *American Anthropologist* 93:894-918.

Hohmann, Bobbi, Terry G. Powis, and Paul F. Healy

2018 Middle Preclassic Maya Shell Ornament Production: Implications for the Development of Complexity at Pacbitun, Belize*.* In *Pathways to Complexity: A View from the Maya Lowlands*, edited by M. Kathryn Brown, and George J Bey III, pp. 117-146. University Press of Florida, Gainesville.

Hodder, Ian

2014 Ҫatalhöyük: the leopard changes its spots. A summary of recent work. *Anatolian Studies* 64:1-22.

Hodder, Ian, and Peter Pels

2010 History Houses: a new interpretation of architectural elaboration at Catalhoyuk*.* In *Religion in the Emergence of Civilization: Catalhoyuk As a Case Study*, edited by Ian Hodder, pp. 163–186. Cambridge University Press, Cambridge.

Houston, Stephen D.

2000 Into the Minds of Ancients: Advances in Maya Glyph Studies. *Journal of World Prehistory* 14(2):121-201.

Hutson, Scott R.

2016 *Ancient Urban Maya: Neighborhoods, Inequality and Built Form* Gainesville, University Press of Florida.

Hutson, Scott R.

2020a Inequality and Social Groups*.* In *The Maya World*, edited by Scott R. Hutson, and Traci Ardren, pp. 407-423. Routledge, New York.

Hutson, Scott R.

2020b Similar Markets, Different Economies: Comparing Small Households at Tikal and Chunchucmil In *The Real Business of Ancient Maya Economies: From Farmers' Fields to Rulers' Realms*, edited by Mailyn Masson, and Arthur A. Demarest, pp. 57-78. University Press of Florida, Gainesville.

Isaza Aizpurúa, Ilean Isel, and Patricia A. McAnany

1999 Adornment and Identity: Shell Adornments from formative Kaxob. *Ancient Mesoamerica* 10(01):117-127.

Kohler, Timothy A., Amy Bogaard, and Scott G. Ortman

2025 Introducing the Special Feature on housing differences and inequality over the very long term. *PNAS* 122(16):1-11.

Kovacevich, Brigitte A.

2017 The Value of Labor: How the Production Process Added Value to Pre-Columbian Maya Jade*.* In *The Value of Things: Prehistoric to Contemporary Commodities in the Maya Region*, edited by Jennifer P. Mathews, and Thomas Guderjan, pp. 17-29. University of Arizona Press, Tucson.

Kuijt, Ian

2019 Material geographies of House Societies: reconsidering Neolithic Ҫatalhöyük, Turkey. *Cambridge Archaeological Journal* 28(4):565–590.

Kuijt, Ian, Emma Guerrero, Miguel Molist, and Josep Anfruns

2011 The changing Neolithic household: Household autonomy and social segmentation, Tell Halula, Syria. *Journal of Anthropological Archaeology* 30(4):502–522.

Lewis, Oscar

1973 The material culture of the poor: A case study of a Mexico City vecindad*.* In *Variation in anthropology*, edited by Donald W. Lathrap, and Jody Douglas, pp. 253-277. Illinois Archaeological Survey, Urbana.

Masson, Marilyn A., and David A. Freidel

2012 An Argument for Classic-era Maya Market Exchange. *Journal of Anthropological Archaeology* 31:455-484.

Masson, Marilyn A., and Carlos Peraza Lope

2014 Archaeological Investigations of an Ancient Urban Place*.* In *Kukulcan's Realm: Urban Life at Ancient Mayapan*, edited by Marilyn Masson, and Carlos Peraza Lope, pp. 269-424. University Press of Colorado, Boulder.

McAnany, Patricia A.

1993 The Economics of Social Power and Wealth among Eighth Century Maya Households*.* In *Lowland Maya Civilization in the Eighth Century AD*, edited by Jeremy A. Sabloff, and John S. Henderson, pp. 65-90. Dumbarton Oaks, Washington D. C.

Meierhoff, James, Mark Golitko, and James D. Morris

2012 Obsidian Acquisition, Trade, and Regional Interaction at CHan*.* In *Chan: An Ancient Maya Farming Community*, edited by Cynthia Robin, pp. 271-288. Unviersity Press of Florida, Gainesville.

Mellaart, James

1967 *Ҫatal Höyüuk: A Neolithic Town in Anatolia.* Thames and Hudson, London:.

Moholy-Nagy, Hattula

1985 The Social and Ceremonial Uses of Marine Mollusks at Tikal*.* In *Prehistoric Lowland Maya Environment and Subsistence Economy*, edited by Mary Pohl, pp. 147-158. Peabody Museum of Archaeology and Ethnology, Harvard University, Cambridge, MA.

Moholy-Nagy, Hattula

1989 Who Used Obsidian at Tikal? In *La Obsidiana en Mesoamerica*, edited by Margarita Gaxiola G., and John E. Clark, pp. 379-390. INAH, Mexico City.

Moholy-Nagy, Hattula

1995 Shells and Society at Tikal, Guatemala. *Expedition* 37(2):3-13.

Paris, Elizabeth

2008 Metallurgy, Mayapan, and the Postclassic World System. *Ancient Mesoamerica* 19(1):43-66.

Peraza Lope, Carlos, Marilyn A. Masson, Timothy S. Hare, Wilberth Cruz Alvarado, and Luis Flores Cobá

2021 Pottery Assemblage Variation at Mayapán Residences*.* In *Settlement, Economy, and Society, at Mayapan, Yucatan, Mexico*, edited by Marilyn A. Masson, Timothy S. Hare, Carlos Peraza Lope, and Bradley W. Russell, pp. 223-254. University of Pittsburgh Memoirs in Latin American Archaeology, Vol. 27. Center for Comparative Archaeology, Pittsburgh.

Peterson, Christian E., and Robert D. Drennan

2018 Letting the Gini out of the Bottle: Measuring Ineuqality Archaeologically*.* In *Ten Thousand Years of Inequality: The Archaeology of Wealth Differences*, edited by Timothy A. Kohler, and Michael E. Smith, pp. 39-66. University of Arizona Press, Tucson.

Prentiss, Anna Marie, Thomas A. Foor, Ashley Hampton, Ethan Ryan, and Matthew J. Walsh

2018 The evolution of material wealth-based inequality: the record of Housepit 54, Bridge River, British Columbia. *American Antiquity* 83(4):598-618.

Rathje, William L.

1972 Praise the gods and pass the Metates*.* In *Contemporary Archaeology*, edited by Mark P. Leone. Southern Illinois University Press, Carbondale.

Rice, Prudence M.

1987 Economic Change in the Lowland Maya Late Classic Period*.* In *Specialization, Exchange and Complex Societies*, edited by Elizabeth M. Brumfiel, and Timothy K. Earle, pp. 76-85. Cambridge University Press, Cambridge.

Reents-Budet, Dorie, Ronald L. Bishop, Jennifer T. Taschek, and Joseph W. Ball

2000 Out of the Palace Dumps: Ceramic Production and Use at Buenavista del Cayo, Belize. *Ancient Mesoamerica* 11(01):99-121.

Rosenberg, Michael, and Thomas Rocek

2019 Socio-political organization in the Aceramic Neolithic of southwestern Asia: The complex evolution of socio-political complexity. . *Journal of Anthropological Archaeology* 54:17–30.

Smith, Michael E.

1987 Household possessions and wealth in agrarian states: implications for archaeology. *Journal of Anthropological Archaeology* 6(4):297-335.

Smith, Michael E., Timothy Dennehy, April Kamp-Whittaker, Emily Colon, and Rebecca Harkness

2014 Quantitative Measures of Wealth Inequality in Ancient Central Mexican Communities. *Advances in Archaeological Practice* 2(4):311-323.

Taube, Karl

1998 The Jade Hearth: Centrality, Rulership, and the Classic Maya Temple*.* In *Function and Meaning in Classic Maya Architecture*, edited by Stephen Houston, pp. 427-478. Dumbarton OAks, Washington D. C.

Tourtellot, Gair, Kelli Carmean, and Jeremy A. Sabloff

1992 "Will the Real Elites Please Stand up?": an Archaeological Assessment of Maya elite behavior in the Terminal Classic Period*.* In *Mesoamerican Elites: an Archaeological Assessment*, edited by Diane Z. Chase, and Arlen F. Chase, pp. 80-98. University of Oklahoma Press, Norman.

Tozzer, Alfred M.

1941 *Landa's Relacion de las Cosas de Yucatan: A Translation*. Papers of the Peabody Museum of American Archaeology and Ethnology, Harvard University, vol. XVII. Peabody Museum of American Archaeology and Ethnology, Cambridge, MA.

Trubitt, Mary Beth D.

2003 The Production and Exchange of Marine Shell Prestige Goods. *Journal of Archaeological Research* 11(3):243-277.

Tsoraki, Christina

2021 The ground stone technologies at Neolithic Ҫatalhöyük: issues of production, use and deposition*.* In *The Matter of Ҫatalhöyük: Reports from the 2009–2017 Seasons*, edited by Ian Hodder, pp. 309–370. Oxbow, Oxford.

Twiss, Katheryn C., Amy Bogaard, Scott Haddow, Marco MilellaI, James S. Taylor, Rena Veropoulidou, Kevin Kay, Christopher J. Knu¨sel, Christina Tsoraki, Milena Vasić, Jessica Pearson, Gesualdo Busacca, Camilla Mazzucato, and Sharon Pochron

2024 “But some were more equal than others:” Exploring inequality at Neolithic C¸ atalho¨yu¨k. *PLOS One*.

Vesteinsson, Orri, Michelle Hegmon, Jetti Arneborg, Glen Rice, and Will G. Russell

2019 Dimensions of inequality. Comparing the North Atlantic and the US Southwest. *Journal of Anthropological Archaeology* 54:172-191.

Wright, Katherine I.

2014 Domestication and inequality? Households, corporate groups and food processing tools at Neolithic Catalhoyuk. *Journal of Anthropological Archaeology* 33(0):1-33.
